# Supplementary material for: Exploring the Role of Plasma Lipids and Statins Interventions on Multiple Sclerosis Risk and Severity: A Mendelian Randomization Study
Source: bioRxiv or medRxiv preprint supplement (doi:10.1101/2022.08.01.22277781), 2022-08-05
Supplement: Supplementary file [file media-1.pdf]

# Exploring the Role of Plasma Lipids and Statins Interventions on Multiple Sclerosis Risk and Severity: A Mendelian Randomization Study

Mona M. Almrhamhi, MSc<sup>1,2</sup>, Chris Finan, PhD<sup>3,4,5</sup>, Catherine S. Storm, BSc<sup>1</sup>, Amand F. Schmidt, PhD<sup>3,4,5</sup>, Demis A. Kia, MBBS<sup>1</sup>, Rachel Coneys, BSc<sup>6</sup>, Sandesh Chopade, MSc<sup>3,4</sup>, Aroon D. Hingorani, PhD, FRCP<sup>3,4,7</sup>, Nicholas W. Wood PhD, FRCP, FMedSci<sup>1</sup>

**Affiliations:**<sup>1</sup>Department of Clinical and Movement Neurosciences, University College London Queen Square Institute of Neurology, London, United Kingdom; <sup>2</sup> Faculty of Applied Medical Sciences, King Abdulaziz University, Kingdom of Saudi Arabia; <sup>3</sup>Institute of Cardiovascular Science, Faculty of Population Health, University College London, London, United Kingdom; <sup>4</sup>British Heart Foundation University College London Research Accelerator, London, United Kingdom; <sup>5</sup>Department of Cardiology, Division Heart and Lungs, University Medical Center Utrecht, Utrecht, the Netherlands; <sup>6</sup>Department of Clinical and Movement Neurosciences, Queen Square Institute of Neurology, University College London, London, United Kingdom. <sup>7</sup>Health Data Research UK London, University College London

## Supplementary

### MS severity data

The MS severity score is an algorithm that relates scores on the EDSS to the distribution of disability in patients with comparable disease durations<sup>1</sup>. The MS severity score is designed to predict disease severity.

We obtained the summary statistics data for MS severity, from Professor Jacob McCauley, the corresponding author of the original publication<sup>2</sup>. The MS severity data has been generated from a genome-wide scan performed in MS cases (7,069 cases) to identify genetic variants that might influence MS severity<sup>2</sup>. In this severity-based analysis, the MS cases obtained from the discovery phase of the primary analysis of susceptibility of the 2011 GWAS, which included 9,772 cases and 17,376 controls<sup>2</sup>. Of the 9,772 cases, the disease severity (as measured by MS severity score) was available for only 7,069 cases, thus association analyses were only performed on 7,069 cases<sup>2</sup>. No genetic variants with strong evidence ( $p\text{-value} < 5 \times 10^{-8}$ ) for association with MS severity were identified in that severity-based analysis<sup>2</sup>.

**Table S1:** The Rho GTPase family and cholesterol biosynthesis pathway (mevalonate pathway) gene list (part 1)

| HGNC symbol    | Ensemble Gene ID | Description                                                | Participant of           | Genes - MS risk analyses | Genes - MS severity analyses |
|----------------|------------------|------------------------------------------------------------|--------------------------|--------------------------|------------------------------|
| <i>PPAPDC2</i> | ENSG00000205808  | phosphatidic acid phosphatase type 2 domain containing 2   | Cholesterol biosynthesis | Yes                      | Yes                          |
| <i>HMGCS1</i>  | ENSG00000112972  | 3-hydroxy-3-methylglutaryl-CoA synthase 1 (soluble)        | Cholesterol biosynthesis | Yes                      | Yes                          |
| <i>TM7SF2</i>  | ENSG00000149809  | transmembrane 7 superfamily member 2                       | Cholesterol biosynthesis | Yes                      | Yes                          |
| <i>ARV1</i>    | ENSG00000173409  | ARV1 homolog ( <i>S. cerevisiae</i> )                      | Cholesterol biosynthesis | Yes                      | Yes                          |
| <i>ID11</i>    | ENSG00000067064  | isopentenyl-diphosphate delta isomerase 1                  | Cholesterol biosynthesis | Yes                      | Yes                          |
| <i>HMGCR</i>   | ENSG00000113161  | 3-hydroxy-3-methylglutaryl-CoA reductase                   | Cholesterol biosynthesis | Yes                      | Yes                          |
| <i>LBR</i>     | ENSG00000143815  | lamin B receptor                                           | Cholesterol biosynthesis | Yes                      | Yes                          |
| <i>PMVK</i>    | ENSG00000163344  | phosphomevalonate kinase                                   | Cholesterol biosynthesis | Yes                      | Yes                          |
| <i>FDFT1</i>   | ENSG00000079459  | farnesyl-diphosphate farnesyltransferase 1                 | Cholesterol biosynthesis | Yes                      | Yes                          |
| <i>DHCR24</i>  | ENSG00000116133  | 24-dehydrocholesterol reductase                            | Cholesterol biosynthesis | Yes                      | Yes                          |
| <i>MVK</i>     | ENSG00000110921  | mevalonate kinase                                          | Cholesterol biosynthesis | Yes                      | No                           |
| <i>FDPS</i>    | ENSG00000160752  | farnesyl diphosphate synthase                              | Cholesterol biosynthesis | Yes                      | Yes                          |
| <i>ACAT2</i>   | ENSG00000120437  | acetyl-CoA acetyltransferase 2                             | Cholesterol biosynthesis | Yes                      | Yes                          |
| <i>GGPS1</i>   | ENSG00000152904  | geranylgeranyl diphosphate synthase 1                      | Cholesterol biosynthesis | Yes                      | Yes                          |
| <i>CYP51A1</i> | ENSG00000001630  | cytochrome P450, family 51, subfamily A, polypeptide 1     | Cholesterol biosynthesis | Yes                      | Yes                          |
| <i>HSD17B7</i> | ENSG00000132196  | hydroxysteroid (17-beta) dehydrogenase 7                   | Cholesterol biosynthesis | Yes                      | Yes                          |
| <i>MVD</i>     | ENSG00000167508  | mevalonate (diphospho) decarboxylase                       | Cholesterol biosynthesis | Yes                      | Yes                          |
| <i>SQLE</i>    | ENSG00000104549  | squalene epoxidase                                         | Cholesterol biosynthesis | Yes                      | Yes                          |
| <i>SC5DL</i>   | ENSG00000109929  | sterol-C5-desaturase                                       | Cholesterol biosynthesis | Yes                      | Yes                          |
| <i>LSS</i>     | ENSG00000160285  | lanosterol synthase (2,3-oxidosqualene-lanosterol cyclase) | Cholesterol biosynthesis | Yes                      | Yes                          |
| <i>MSMO1</i>   | ENSG00000052802  | methylsterol monooxygenase 1                               | Cholesterol biosynthesis | NO                       | NO                           |
| <i>EBP</i>     | ENSG00000147155  | emopamil binding protein (sterol isomerase)                | Cholesterol biosynthesis | NO                       | NO                           |
| <i>ID12</i>    | ENSG00000148377  | isopentenyl-diphosphate delta isomerase 2                  | Cholesterol biosynthesis | NO                       | NO                           |
| <i>NSDHL</i>   | ENSG00000147383  | NAD(P) dependent steroid dehydrogenase-like                | Cholesterol biosynthesis | NO                       | NO                           |
| <i>DHCR7</i>   | ENSG00000172893  | 7-dehydrocholesterol reductase                             | Cholesterol biosynthesis | Yes                      | NO                           |
| <i>RHOV</i>    | ENSG00000104140  | ras homolog family member V                                | member of Rho GTPase     | NO                       | NO                           |
| <i>RHOB*</i>   | ENSG00000143878  | ras homolog family member B                                | member of Rho GTPase     | Yes                      | Yes                          |
| <i>CDC42*</i>  | ENSG00000070831  | cell division cycle 42                                     | member of Rho GTPase     | Yes                      | Yes                          |
| <i>RHOG*</i>   | ENSG00000177105  | ras homolog family member G                                | member of Rho GTPase     | Yes                      | Yes                          |

|                |                 |                                                                                         |                      |     |     |
|----------------|-----------------|-----------------------------------------------------------------------------------------|----------------------|-----|-----|
| <i>RHOD*</i>   | ENSG00000173156 | ras homolog family member D                                                             | member of Rho GTPase | Yes | NO  |
| <i>RHOF*</i>   | ENSG00000139725 | ras homolog family member F (in filopodia)                                              | member of Rho GTPase | Yes | Yes |
| <i>RHOQ*</i>   | ENSG00000119729 | ras homolog family member Q                                                             | member of Rho GTPase | Yes | Yes |
| <i>RAC2*</i>   | ENSG00000128340 | ras-related C3 botulinum toxin substrate 2 (rho family, small GTP binding protein Rac2) | member of Rho GTPase | Yes | Yes |
| <i>RAC1*</i>   | ENSG00000136238 | ras-related C3 botulinum toxin substrate 1 (rho family, small GTP binding protein Rac1) | member of Rho GTPase | Yes | Yes |
| <i>RHOH*</i>   | ENSG00000168421 | ras homolog family member H                                                             | member of Rho GTPase | Yes | Yes |
| <i>RHOBTB2</i> | ENSG00000008853 | Rho-related BTB domain containing 2                                                     | member of Rho GTPase | Yes | Yes |

**Table S1:** The Rho GTPase family and cholesterol biosynthesis pathway (mevalonate pathway) gene list (*part 2*)

| HGNC symbol    | Ensemble Gene ID | Description                                                                             | Participant of       | Genes - MS risk analyses | Genes - MS severity analyses |
|----------------|------------------|-----------------------------------------------------------------------------------------|----------------------|--------------------------|------------------------------|
| <i>RAC3*</i>   | ENSG00000169750  | ras-related C3 botulinum toxin substrate 3 (rho family, small GTP binding protein Rac3) | member of Rho GTPase | NO                       | NO                           |
| <i>RHOU</i>    | ENSG00000116574  | ras homolog family member U                                                             | member of Rho GTPase | Yes                      | NO                           |
| <i>RHOBTB1</i> | ENSG00000072422  | Rho-related BTB domain containing 1                                                     | member of Rho GTPase | Yes                      | Yes                          |
| <i>RND2*</i>   | ENSG00000108830  | Rho family GTPase 2                                                                     | member of Rho GTPase | NO                       | NO                           |
| <i>RHOC*</i>   | ENSG00000155366  | ras homolog family member C                                                             | member of Rho GTPase | Yes                      | Yes                          |
| <i>RND1*</i>   | ENSG00000172602  | Rho family GTPase 1                                                                     | member of Rho GTPase | Yes                      | Yes                          |
| <i>RND3*</i>   | ENSG00000115963  | Rho family GTPase 3                                                                     | member of Rho GTPase | NO                       | NO                           |
| <i>RHOA*</i>   | ENSG00000067560  | ras homolog family member A                                                             | member of Rho GTPase | NO                       | NO                           |
| <i>RHOJ*</i>   | ENSG00000126785  | ras homolog family member J                                                             | member of Rho GTPase | NO                       | NO                           |

The table includes 25 genes that were flagged as being involved in the cholesterol biosynthesis pathway in the Reactome database of human pathways and reactions (<http://www.reactome.org>). The 20 genes of the Rho GTPase family were extracted from Azzarelli, 2015<sup>3</sup>. For each gene, the HGNC symbol (HUGO Gene Nomenclature Committee), Ensemble gene ID and description were derived from the Ensembl database (<https://www.ensembl.org/index.html>). In the last two columns, ‘Yes’ indicates that a gene was included in the MR analysis, while ‘NO’ indicates that a gene was not included in the MR analysis due to either no SNPs being robustly associated with the target gene at a p-value  $< 5 \times 10^{-8}$  or the eQTL data being absent.

\* Rho GTPases that undergo prenylation, a total of 16 family members, which are the primary focus of the current study.

**Table S 2:** MR analysis of the effect of lipid level on MS risk

| Lipid trait                   | Method   | No. of SNPs | OR (95 % CI)         | p-value  | FDR      | pleiotropy assessment |                    |                    |                            |
|-------------------------------|----------|-------------|----------------------|----------|----------|-----------------------|--------------------|--------------------|----------------------------|
|                               |          |             |                      |          |          | Q p-value             | I <sup>2</sup> (%) | MR-Egger intercept | MR-Egger intercept p-value |
| HDL-C                         | IVW      | 118         | 1.144<br>(1.04,1.26) | 7.94E-03 | 2.38E-02 |                       |                    |                    |                            |
| HDL-C                         | MR Egger | 118         | 1.229<br>(1.02,1.48) | 3.03E-02 |          | 6.38E-06              | 40.5               | -0.004             | 3.66E-01                   |
| HDL-C adjusted for LDL-C & TG | MVMR     | 118         | 1.255<br>(1.06,1.49) | 0.00913  |          |                       |                    |                    |                            |
| LDL-C                         | IVW      | 99          | 0.996 (0.9,1.1)      | 9.36E-01 | 9.36E-01 |                       |                    |                    |                            |
| LDL-C                         | MR Egger | 99          | 1.002<br>(0.85,1.18) | 9.82E-01 |          | 1.30E-09              | 52.5               | -5.00E-04          | 9.27E-01                   |
| LDL-C adjusted for HDL-C & TG | MVMR     | 99          | 1.024<br>(0.94,1.12) | 0.607    |          |                       |                    |                    |                            |
| TG                            | IVW      | 65          | 0.921<br>(0.81,1.04) | 2.00E-01 | 3.00E-01 |                       |                    |                    |                            |
| TG                            | MR Egger | 65          | 0.859 (0.7,1.05)     | 1.36E-01 |          | 1.50E-04              | 43.6               | 0.0046             | 3.70E-01                   |
| TG adjusted for HDL-C & LDL-C | MVMR     | 65          | 1.076<br>(0.88,1.32) | 0.472    |          |                       |                    |                    |                            |

HDL-C, high-density lipoprotein cholesterol; LDL-C, low-density lipoprotein cholesterol; TG, triglyceride; No. of SNPs, the number of independent genome-wide significant single nucleotide polymorphisms; IVW, inverse-variance weighted; MVMR, multivariable MR; OR, odds ratio; CI, confidence interval; Q p-value, Cochran's Q statistic; FDR, false discovery rate;  $I^2$  (%) expresses the level of heterogeneity as a percentage.

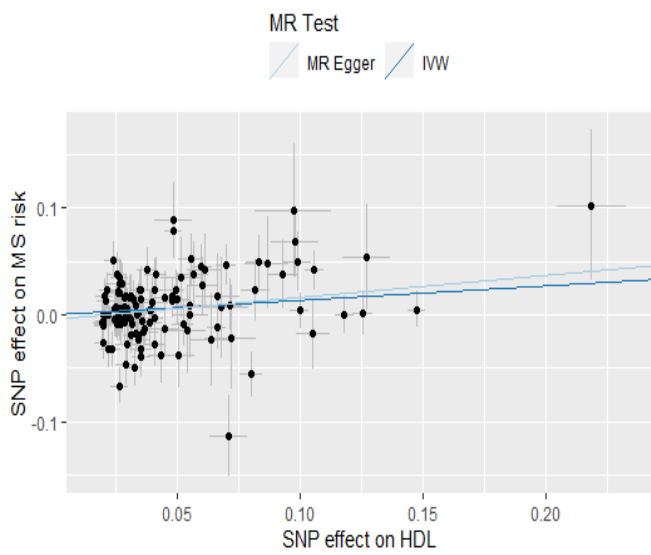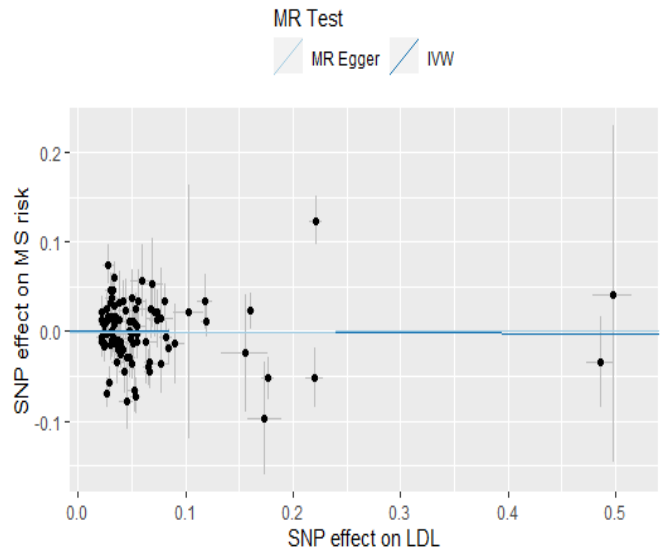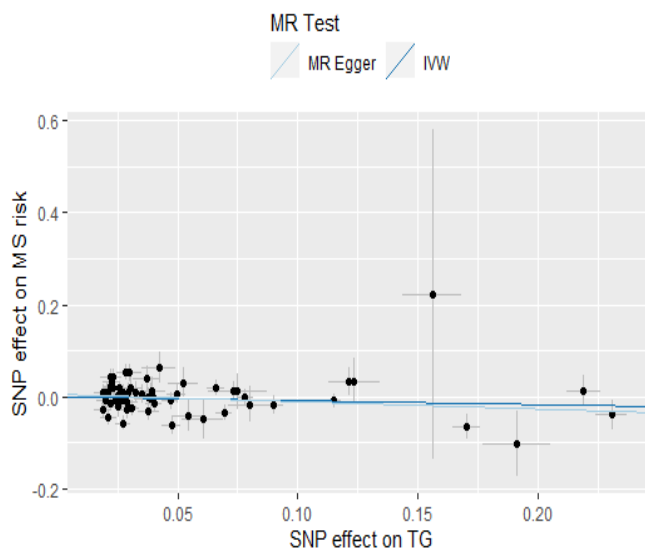

**Figure S 1:** Scatter plots for MR analyses showing the causal estimates of the lipid fractions on MS risk. The effect sizes of each genetic variant (with 95% confidence intervals) are represented by black points. The slope of each line shows the estimated MR effect for each method.

**Table S3:** MR analysis of the effect of lipid level on MS severity

| Trait                       | Method   | No. of SNP | Beta (95 % CI)      | p-value  | FDR   | Pleiotropy assessment |        |                    |                            |
|-----------------------------|----------|------------|---------------------|----------|-------|-----------------------|--------|--------------------|----------------------------|
|                             |          |            |                     |          |       | Q p-value             | I2 (%) | MR-Egger intercept | MR-Egger intercept p-value |
| HDL-C                       | IVW      | 83         | -0.155 (-0.33,0.02) | 0.0847   | 0.254 |                       |        |                    |                            |
| HDL-C                       | MR Egger | 83         | -0.039 (-0.49,0.41) | 0.867    |       | 1                     | 0      | -0.0067            | 0.546                      |
| HDL-C adjusted for LDL & TG | MVMR     | 83         | -0.059 (-0.4,0.28)  | 0.735    |       |                       |        |                    |                            |
| LDL-C                       | IVW      | 70         | -0.091 (-0.3,0.12)  | 0.402    | 0.603 |                       |        |                    |                            |
| LDL-C                       | MR Egger | 70         | -0.019 (-0.43,0.4)  | 0.929    |       | 0.805                 | 0      | -0.005             | 0.684                      |
| LDL-C adjusted for HDL & TG | MVMR     | 70         | 0.012 (-0.35,0.37)  | 9.49E-01 |       |                       |        |                    |                            |
| TG                          | IVW      | 46         | -0.001 (-0.19,0.19) | 0.991    | 0.991 |                       |        |                    |                            |
| TG                          | MR Egger | 46         | 0.08 (-0.39,0.54)   | 0.738    |       | 1                     | 0      | -0.0055            | 0.661                      |
| TG adjusted for HDL & LDL   | MVMR     | 46         | 0.035 (-0.22,0.29)  | 7.88E-01 |       |                       |        |                    |                            |

The results reported as ORs with the 95% CI per 1-SD increase of lipid fractions. *For Abbreviations, see Table S2.*

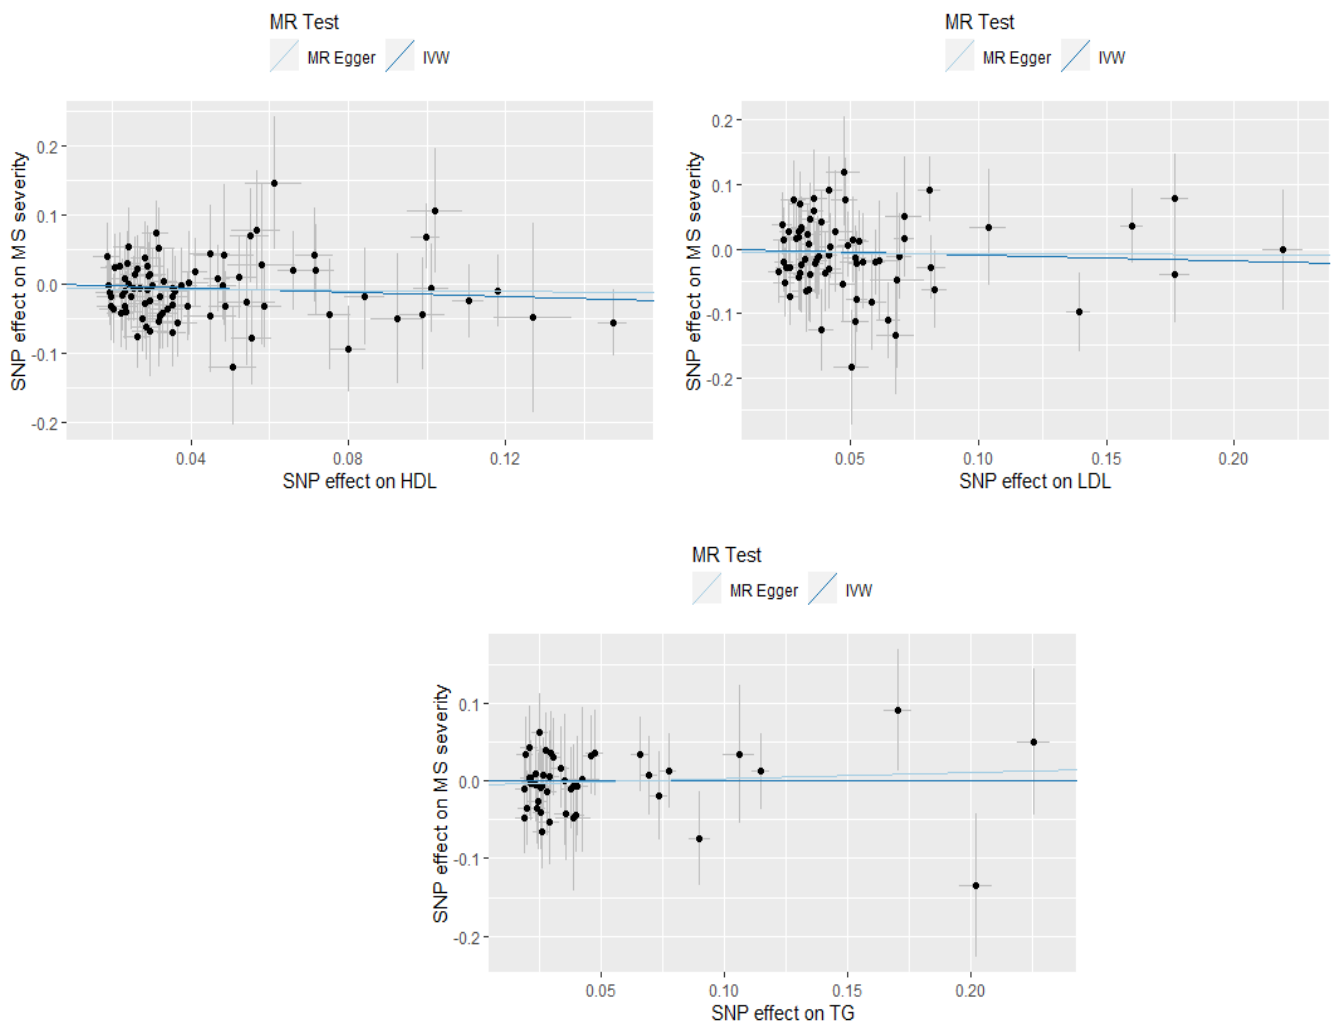

**Figure S2:** Scatter plots for MR analyses showing the causal estimates of the lipid fractions on MS severity. The effect sizes of each genetic variant (with 95% confidence intervals) are represented by black points. The slope of each line shows the estimated MR effect for each method.

**Table S4:** MR analysis of the effect of MS risk on lipid levels

| Outcome      | Method   | No. of SNP | Beta (95 % CI)      | p-value | FDR   | Pleiotropy assessment |                    |                    |                            |
|--------------|----------|------------|---------------------|---------|-------|-----------------------|--------------------|--------------------|----------------------------|
|              |          |            |                     |         |       | Q p-value             | I <sup>2</sup> (%) | MR-Egger intercept | MR-Egger intercept p-value |
| <b>HDL-C</b> | IVW      | 118        | -0.004 (-0.02,0.01) | 0.591   | 0.886 |                       |                    |                    |                            |
| <b>HDL-C</b> | MR Egger | 118        | -0.016 (-0.06,0.03) | 0.498   |       | 4.05E-12              | 54                 | 0.0012             | 0.593                      |
| <b>LDL-C</b> | IVW      | 118        | -0.008 (-0.02,0.01) | 0.295   | 0.885 |                       |                    |                    |                            |
| <b>LDL-C</b> | MR Egger | 118        | 0 (-0.04,0.05)      | 0.991   |       | 2.61E-07              | 44.5               | -0.0008            | 0.717                      |
| <b>TG</b>    | IVW      | 119        | 0 (-0.01,0.01)      | 0.961   | 0.961 |                       |                    |                    |                            |
| <b>TG</b>    | MR Egger | 119        | 0.017 (-0.02,0.06)  | 0.405   |       | 2.55E-06              | 41.6               | -0.0017            | 0.37                       |

The associations between genetically predicted MS risk and the lipid fractions are presented as 1-SD with 95% CI per 1-unit-higher log-odds of MS risk. *For Abbreviations, see Table S2.*



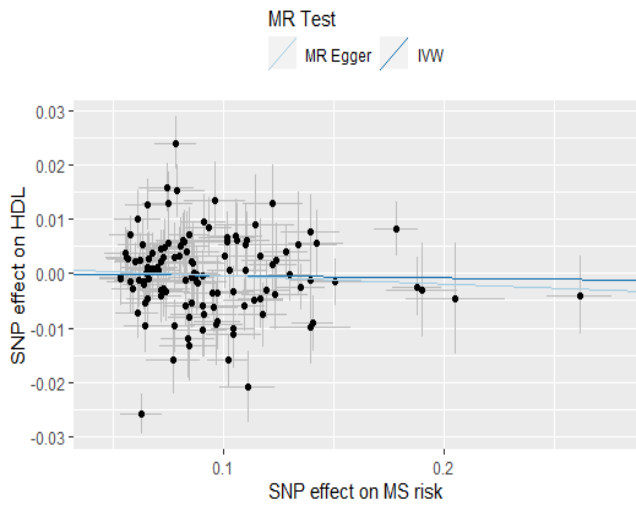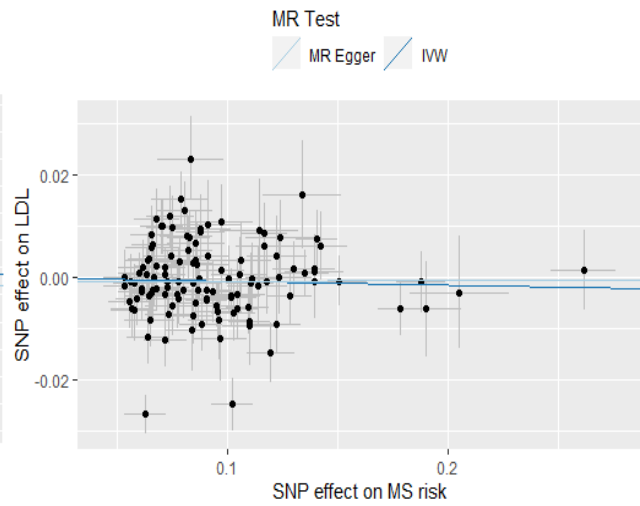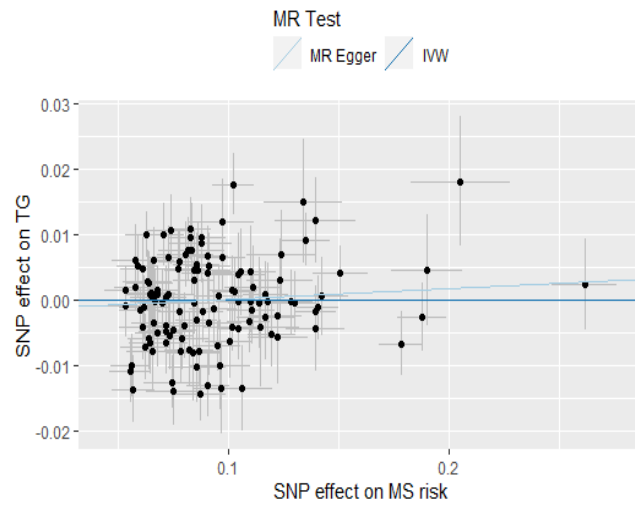

**Figure S3:** Scatter plots for MR analyses showing the causal estimates of the MS risk on lipid fractions. The effect sizes of each genetic variant (with 95% confidence intervals) are represented by black points. The slope of each line shows the estimated MR effect for each method.

**Table S5:** MR estimates for the genetically mimicked effects of statins on MS risk (*part 1*)

| Trait          | Method     | No. of SNPs | OR (95 % CI)      | p-value  | FDR      | pleiotropy assessment |                    |                    |                            |
|----------------|------------|-------------|-------------------|----------|----------|-----------------------|--------------------|--------------------|----------------------------|
|                |            |             |                   |          |          | Q p-value             | I <sup>2</sup> (%) | MR-Egger intercept | MR-Egger intercept p-value |
| <i>ACAT2</i>   | IVW        | 5           | 1.035(0.92,1.17)  | 5.77E-01 | 8.74E-01 |                       |                    |                    |                            |
| <i>ACAT2</i>   | MR Egger   | 5           | 1.043(0.89,1.22)  | 6.00E-01 |          | 6.27E-01              | 0                  | -0.0076            | 4.85E-01                   |
| <i>ARVI</i>    | IVW        | 10          | 0.939(0.86,1.03)  | 1.84E-01 | 7.38E-01 |                       |                    |                    |                            |
| <i>ARVI</i>    | MR Egger   | 10          | 0.941(0.84,1.05)  | 2.96E-01 |          | 6.79E-01              | 0                  | -4.00E-04          | 9.52E-01                   |
| <i>CYP51A1</i> | IVW        | 3           | 1.029(0.89,1.19)  | 6.99E-01 | 8.74E-01 |                       |                    |                    |                            |
| <i>CYP51A1</i> | MR Egger   | 3           | 1.046(0.38,2.85)  | 9.30E-01 |          | 7.93E-01              | 0                  | -0.0036            | 9.69E-01                   |
| <i>DHCR24</i>  | IVW        | 9           | 1.053(0.92,1.2)   | 4.37E-01 | 8.74E-01 |                       |                    |                    |                            |
| <i>DHCR24</i>  | MR Egger   | 9           | 1.024(0.73,1.44)  | 8.90E-01 |          | 9.61E-01              | 0                  | 0.0072             | 8.12E-01                   |
| <i>DHCR7</i>   | Wald ratio | 1           | 0.431(0.18,1.02)  | 5.68E-02 | 6.05E-01 |                       |                    |                    |                            |
| <i>FDFT1</i>   | IVW        | 25          | 0.984(0.95,1.02)  | 4.07E-01 | 8.74E-01 |                       |                    |                    |                            |
| <i>FDFT1</i>   | MR Egger   | 25          | 0.979(0.94,1.02)  | 2.62E-01 |          | 3.33E-01              | 0.053              | 0.0058             | 6.12E-02                   |
| <i>FDPS</i>    | Wald ratio | 1           | 0.878(0.57,1.35)  | 5.53E-01 | 8.74E-01 |                       |                    |                    |                            |
| <i>GGPS1</i>   | IVW        | 6           | 1.009(0.9,1.13)   | 8.74E-01 | 8.74E-01 |                       |                    |                    |                            |
| <i>GGPS1</i>   | MR Egger   | 6           | 1.018(0.84,1.24)  | 8.61E-01 |          | 3.29E-01              | 0                  | -0.0027            | 9.16E-01                   |
| <i>HMGCR</i>   | IVW        | 3           | 1.178(0.89,1.56)  | 2.50E-01 | 7.38E-01 |                       |                    |                    |                            |
| <i>HMGCR</i>   | MR Egger   | 3           | 1.074(0.09,12.56) | 9.55E-01 |          | 3.33E-01              | 0                  | 0.0101             | 9.41E-01                   |
| <i>HMGCS1</i>  | Wald ratio | 1           | 1.877(0.92,3.82)  | 8.24E-02 | 6.05E-01 |                       |                    |                    |                            |
| <i>HSD17B7</i> | IVW        | 9           | 1.061(0.83,1.36)  | 6.40E-01 | 8.74E-01 |                       |                    |                    |                            |
| <i>HSD17B7</i> | MR Egger   | 9           | 1.132(0.76,1.69)  | 5.45E-01 |          | 8.56E-02              | 0.36               | -0.0101            | 7.01E-01                   |
| <i>IDI1</i>    | IVW        | 4           | 0.941(0.59,1.51)  | 8.00E-01 | 8.74E-01 |                       |                    |                    |                            |
| <i>IDI1</i>    | MR Egger   | 4           | 0.493(0.21,1.17)  | 1.10E-01 |          | 4.97E-02              | 0.5                | 0.0491             | 1.13E-01                   |
| <i>LBR</i>     | IVW        | 3           | 0.77(0.48,1.22)   | 2.69E-01 | 7.38E-01 |                       |                    |                    |                            |
| <i>LBR</i>     | MR Egger   | 3           | 0.608(0.985,61)   | 8.95E-01 |          | 8.75E-01              | 0                  | 0.0174             | 9.46E-01                   |
| <i>LSS</i>     | IVW        | 15          | 0.993(0.94,1.05)  | 8.03E-01 | 8.74E-01 |                       |                    |                    |                            |
| <i>LSS</i>     | MR Egger   | 15          | 1.006(0.93,1.09)  | 8.82E-01 |          | 3.67E-02              | 0.4                | -0.0028            | 6.84E-01                   |

|            |          |   |                   |          |          |          |     |         |          |
|------------|----------|---|-------------------|----------|----------|----------|-----|---------|----------|
| <b>MVD</b> | IVW      | 8 | 1.061(0.76,1.47)  | 7.26E-01 | 8.74E-01 |          |     |         |          |
| <b>MVD</b> | MR Egger | 8 | 1.047(0.73,1.5)   | 8.01E-01 |          | 7.61E-03 | 0.6 | 0.0019  | 9.16E-01 |
| <b>MVK</b> | IVW      | 3 | 1.079(0.78,1.49)  | 6.39E-01 | 8.74E-01 |          |     |         |          |
| <b>MVK</b> | MR Egger | 3 | 1.237(0.14,10.68) | 8.47E-01 |          | 7.63E-01 | 0   | -0.0148 | 8.87E-01 |

**Table S5:** MR estimates for the genetically mimicked effects of statins on MS risk (*part 2*)

| Trait          | Method   | No. of SNPs | OR (95 % CI)      | p-value         | FDR             | pleiotropy assessment |                    |                    |                            |
|----------------|----------|-------------|-------------------|-----------------|-----------------|-----------------------|--------------------|--------------------|----------------------------|
|                |          |             |                   |                 |                 | Q p-value             | I <sup>2</sup> (%) | MR-Egger intercept | MR-Egger intercept p-value |
| <b>PMVK</b>    | IVW      | 4           | 0.877(0.69,1.11)  | 2.81E-01        | 7.38E-01        |                       |                    |                    |                            |
| <b>PMVK</b>    | MR Egger | 4           | 0.741(0.38,1.43)  | 3.73E-01        |                 | 1.85E-01              | 0.11               | 0.0248             | 5.91E-01                   |
| <b>PPAPDC2</b> | IVW      | 9           | 1.065(0.97,1.17)  | 2.02E-01        | 7.38E-01        |                       |                    |                    |                            |
| <b>SC5DL</b>   | IVW      | 4           | 0.989(0.89,1.1)   | 8.43E-01        | 8.74E-01        |                       |                    |                    |                            |
| <b>SC5DL</b>   | MR Egger | 4           | 0.993(0.82,1.2)   | 9.40E-01        |                 | 3.21E-01              | 0                  | -0.0013            | 9.62E-01                   |
| <b>SQLE</b>    | IVW      | 5           | 1.024(0.82,1.28)  | 8.38E-01        | 8.74E-01        |                       |                    |                    |                            |
| <b>SQLE</b>    | MR Egger | 5           | 1.054(0.73,1.52)  | 7.80E-01        |                 | 6.65E-01              | 0                  | -0.0067            | 7.69E-01                   |
| <b>TM7SF2</b>  | IVW      | 3           | 0.877(0.75,1.02)  | 8.64E-02        | 6.05E-01        |                       |                    |                    |                            |
| <b>TM7SF2</b>  | MR Egger | 3           | 1.068(0.37,3.06)  | 9.03E-01        |                 | 8.01E-01              | 0                  | -0.0489            | 6.56E-01                   |
| <b>PPAPDC2</b> | MR Egger | 9           | 0.961(0.83,1.11)  | 5.86E-01        |                 | 3.01E-01              | 0.045              | 0.0321             | 7.91E-02                   |
| <b>RAC1</b>    | IVW      | 10          | 1.071(0.96,1.2)   | 2.41E-01        | 5.41E-01        |                       |                    |                    |                            |
| <b>RAC1</b>    | MR Egger | 10          | 1.218(0.9,1.66)   | 2.08E-01        |                 | 7.11E-01              | 0                  | -0.0168            | 3.56E-01                   |
| <b>RAC2</b>    | IVW      | 15          | 0.861(0.78,0.95)  | <b>3.80E-03</b> | <b>5.32E-02</b> |                       |                    |                    |                            |
| <b>RAC2</b>    | MR Egger | 15          | 0.855(0.76,0.96)  | <b>8.14E-03</b> |                 | 6.73E-01              | 0                  | 0.0033             | 5.15E-01                   |
| <b>RHOB</b>    | IVW      | 3           | 0.849(0.53,1.36)  | 4.94E-01        | 5.83E-01        |                       |                    |                    |                            |
| <b>RHOB</b>    | MR Egger | 3           | 1.053(0.07,15.89) | 9.70E-01        |                 | 6.53E-01              | 0                  | -0.0172            | 8.66E-01                   |
| <b>RHOBTB1</b> | IVW      | 13          | 0.977(0.81,1.18)  | 8.09E-01        | 8.09E-01        |                       |                    |                    |                            |
| <b>RHOBTB1</b> | MR Egger | 13          | 1.017(0.86,1.21)  | 8.48E-01        |                 | 4.66E-02              | 0.4                | -0.0154            | 2.42E-01                   |
| <b>RHOBTB2</b> | IVW      | 3           | 0.713(0.51,1)     | 4.94E-02        | 2.21E-01        |                       |                    |                    |                            |
| <b>RHOBTB2</b> | MR Egger | 3           | 0.868(0.36,2.11)  | 7.56E-01        |                 | 5.70E-01              | 0                  | -0.0273            | 5.61E-01                   |
| <b>RHOC</b>    | IVW      | 5           | 1.038(0.83,1.3)   | 7.44E-01        | 8.02E-01        |                       |                    |                    |                            |
| <b>RHOC</b>    | MR Egger | 5           | 1.167(0.75,1.82)  | 4.94E-01        |                 | 5.00E-02              | 0.49               | -0.0268            | 5.62E-01                   |
| <b>RHOD</b>    | IVW      | 2           | 0.544(0.29,1.03)  | 6.30E-02        | 2.21E-01        |                       |                    |                    |                            |
| <b>RHOF</b>    | IVW      | 6           | 1.134(0.93,1.39)  | 2.18E-01        | 5.41E-01        |                       |                    |                    |                            |
| <b>RHOF</b>    | MR Egger | 6           | 0.873(0.43,1.79)  | 7.12E-01        |                 | 6.80E-01              | 0                  | 0.0523             | 4.43E-01                   |
| <b>RHOG</b>    | IVW      | 4           | 1.126(0.85,1.49)  | 4.07E-01        | 5.69E-01        |                       |                    |                    |                            |
| <b>RHOG</b>    | MR Egger | 4           | 1.228(0.84,1.8)   | 2.91E-01        |                 | 2.38E-01              | 0                  | -0.0153            | 4.97E-01                   |
| <b>RHOH</b>    | IVW      | 5           | 0.518(0.29,0.94)  | 3.01E-02        | 2.11E-01        |                       |                    |                    |                            |
| <b>RHOH</b>    | MR Egger | 5           | 1.733(0.74,4.07)  | 2.06E-01        |                 | 4.14E-01              | 0                  | -0.0905            | <b>2.41E-03</b>            |
| <b>RHOQ</b>    | IVW      | 9           | 1.07(0.88,1.3)    | 4.99E-01        | 5.83E-01        |                       |                    |                    |                            |
| <b>RHOQ</b>    | MR Egger | 9           | 0.909(0.66,1.25)  | 5.56E-01        |                 | 5.79E-01              | 0                  | 0.0261             | 1.70E-01                   |

|              |            |    |                  |          |          |          |      |         |          |
|--------------|------------|----|------------------|----------|----------|----------|------|---------|----------|
| <b>RHO</b>   | IVW        | 3  | 1.161(0.89,1.51) | 2.70E-01 | 5.41E-01 |          |      |         |          |
| <b>RHO</b>   | MR Egger   | 3  | 1.327(0.49,3.61) | 5.79E-01 |          | 6.08E-01 | 0    | -0.0196 | 7.59E-01 |
| <b>RND1</b>  | Wald ratio | 1  | 0.805(0.5,1.3)   | 3.77E-01 | 5.69E-01 |          |      |         |          |
| <b>CDC42</b> | IVW        | 10 | 1.054(0.93,1.19) | 3.98E-01 | 5.69E-01 |          |      |         |          |
| <b>CDC42</b> | MR Egger   | 10 | 1.069(0.86,1.32) | 5.43E-01 |          | 3.83E-02 | 0.45 | -0.0041 | 8.85E-01 |

Genes highlighted with orange encode proteins involved in cholesterol biosynthesis, while genes highlighted with green encode members of the Rho family. Pleiotropy assessment cannot be conducted for instruments consisting of  $\leq 2$  independent SNPs as it requires  $> 2$  SNPs. For Abbreviations, see Table S2.

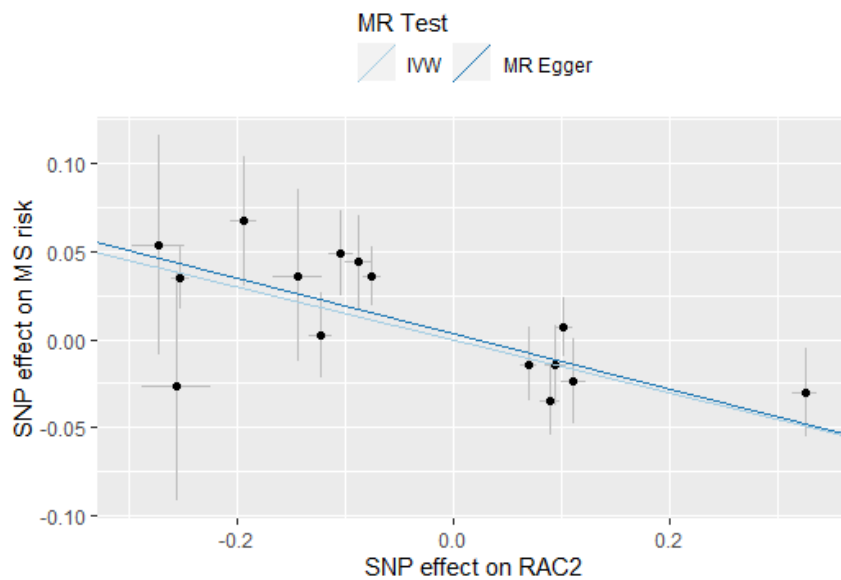

**Figure S4:** Scatter plots for MR analyses showing the causal estimates of *RAC2* on MS risk. The effect sizes of each genetic variant (with 95% confidence intervals) are represented by black points. The slope of each line shows the estimated MR effect for each method.

**Table S6:** MR estimates for the genetically mimicked effects of statins on MS severity (*part 1*)

| Trait          | Method     | No. of SNPs | Beta (95 % CI)     | p-value | FDR   | pleiotropy assessment |                    |                    |                            |
|----------------|------------|-------------|--------------------|---------|-------|-----------------------|--------------------|--------------------|----------------------------|
|                |            |             |                    |         |       | Q p-value             | I <sup>2</sup> (%) | MR-Egger intercept | MR-Egger intercept p-value |
| <i>ACAT2</i>   | IVW        | 3           | -0.145(-0.55,0.26) | 0.486   | 0.936 |                       |                    |                    |                            |
| <i>ACAT2</i>   | MR Egger   | 3           | -0.111(-0.58,0.36) | 0.642   |       | 0.375                 | 0                  | -0.0129            | 0.46                       |
| <i>ARVI</i>    | IVW        | 3           | 0.034(-0.24,0.31)  | 0.808   | 0.951 |                       |                    |                    |                            |
| <i>ARVI</i>    | MR Egger   | 3           | 0.234(-0.46,0.93)  | 0.509   |       | 0.475                 | 0                  | -0.0656            | 0.498                      |
| <i>CYP51A1</i> | Wald ratio | 1           | -0.155(-0.63,0.32) | 0.524   | 0.936 |                       |                    |                    |                            |
| <i>DHCR24</i>  | IVW        | 2           | 0.149(-0.24,0.54)  | 0.456   | 0.936 |                       |                    |                    |                            |
| <i>FDFT1</i>   | IVW        | 8           | 0.163(0,0.33)      | 0.0541  | 0.936 |                       |                    |                    |                            |
| <i>FDFT1</i>   | MR Egger   | 8           | 0.151(-0.04,0.34)  | 0.117   |       | 0.102                 | 0.34               | 0.0042             | 0.834                      |
| <i>FDPS</i>    | Wald ratio | 1           | 0.152(-1.22,1.52)  | 0.828   | 0.951 |                       |                    |                    |                            |
| <i>GGPS1</i>   | IVW        | 2           | 0.003(-0.32,0.33)  | 0.988   | 0.988 |                       |                    |                    |                            |
| <i>HMGCR</i>   | Wald ratio | 1           | 0.274(-0.65,1.2)   | 0.562   | 0.936 |                       |                    |                    |                            |
| <i>HMGCS1</i>  | Wald ratio | 1           | -1.142(-3.19,0.9)  | 0.273   | 0.936 |                       |                    |                    |                            |
| <i>HSD17B7</i> | Wald ratio | 1           | 0.163(-1.21,1.54)  | 0.817   | 0.951 |                       |                    |                    |                            |
| <i>IDII</i>    | IVW        | 3           | -0.11(-0.94,0.72)  | 0.795   | 0.951 |                       |                    |                    |                            |
| <i>IDII</i>    | MR Egger   | 3           | 6.549(0.91,12.19)  | 0.0229  |       | 0.257                 | 0                  | -0.3974            | 0.0192                     |
| <i>LBR</i>     | IVW        | 3           | -0.399(-1.74,0.94) | 0.558   | 0.936 |                       |                    |                    |                            |
| <i>LBR</i>     | MR Egger   | 3           | -0.129(-5.54,5.28) | 0.963   |       | 0.517                 | 0                  | -0.0196            | 0.915                      |
| <i>LSS</i>     | IVW        | 5           | -0.133(-0.28,0.01) | 0.0715  | 0.936 |                       |                    |                    |                            |
| <i>LSS</i>     | MR Egger   | 5           | -0.134(-0.29,0.02) | 0.0942  |       | 0.393                 | 0                  | 0.0007             | 0.98                       |
| <i>MVD</i>     | Wald ratio | 1           | 0.227(-0.94,1.39)  | 0.702   | 0.947 |                       |                    |                    |                            |
| <i>PMVK</i>    | Wald ratio | 1           | 0.482(-0.6,1.56)   | 0.381   | 0.936 |                       |                    |                    |                            |
| <i>PPAPDC2</i> | IVW        | 3           | 0.105(-0.14,0.35)  | 0.404   | 0.936 |                       |                    |                    |                            |
| <i>PPAPDC2</i> | MR Egger   | 3           | 0.212(-12.8,13.23) | 0.975   |       | 0.969                 | 0                  | -0.0279            | 0.985                      |
| <i>SC5DL</i>   | IVW        | 2           | 0.073(-0.26,0.4)   | 0.665   | 0.947 |                       |                    |                    |                            |
| <i>SQLE</i>    | Wald ratio | 1           | 0.038(-1.41,1.48)  | 0.959   | 0.988 |                       |                    |                    |                            |
| <i>TM7SF2</i>  | IVW        | 2           | -0.135(-0.65,0.38) | 0.604   | 0.936 |                       |                    |                    |                            |
| <i>CDC42</i>   | IVW        | 2           | 0.012(-0.73,0.75)  | 0.975   | 0.988 |                       |                    |                    |                            |
| <i>RAC1</i>    | IVW        | 3           | -0.398(-0.92,0.12) | 0.134   | 0.936 |                       |                    |                    |                            |
| <i>RAC1</i>    | MR Egger   | 3           | -0.765(-3.44,1.91) | 0.575   |       | 0.545                 | 0                  | 0.0631             | 0.776                      |
| <i>RAC2</i>    | IVW        | 5           | 0.095(-0.25,0.44)  | 0.588   | 0.936 |                       |                    |                    |                            |

|                |            |   |                    |       |       |       |   |         |       |
|----------------|------------|---|--------------------|-------|-------|-------|---|---------|-------|
| <b>RAC2</b>    | MR Egger   | 5 | 0.099(-0.59,0.79)  | 0.779 |       | 0.79  | 0 | -0.0012 | 0.985 |
| <b>RHOB</b>    | Wald ratio | 1 | -0.646(-2.79,1.5)  | 0.555 | 0.936 |       |   |         |       |
| <b>RHOBTB1</b> | IVW        | 5 | 0.347(-0.15,0.84)  | 0.17  | 0.936 |       |   |         |       |
| <b>RHOBTB1</b> | MR Egger   | 5 | 0.325(-0.65,1.3)   | 0.512 |       | 0.278 | 0 | 0.0042  | 0.956 |
| <b>RHOBTB2</b> | IVW        | 2 | -0.467(-1.78,0.85) | 0.486 | 0.936 |       |   |         |       |
| <b>RHOC</b>    | IVW        | 2 | 0.211(-0.45,0.87)  | 0.531 | 0.936 |       |   |         |       |
| <b>RHOF</b>    | IVW        | 2 | 0.113(-0.44,0.67)  | 0.692 | 0.947 |       |   |         |       |

**Table S6:** MR estimates for the genetically mimicked effects of statins on MS severity (*part 2*)

| Trait       | Method     | No. of SNPs | Beta (95 % CI)      | p-value | FDR   | pleiotropy assessment |    |                    |                            |
|-------------|------------|-------------|---------------------|---------|-------|-----------------------|----|--------------------|----------------------------|
|             |            |             |                     |         |       | Q value               | p- | I <sup>2</sup> (%) | MR-Egger intercept p-value |
| <b>RHOG</b> | IVW        | 4           | -0.366 (-1.12,0.39) | 0.339   | 0.936 |                       |    |                    |                            |
| <b>RHOG</b> | MR Egger   | 4           | -0.231 (-2.1,1.63)  | 0.809   |       | 0.803                 | 0  | -0.023             | 0.779                      |
| <b>RHOH</b> | IVW        | 2           | -0.85 (-2.25,0.55)  | 0.235   | 0.936 |                       |    |                    |                            |
| <b>RHOQ</b> | IVW        | 4           | -0.317 (-0.99,0.36) | 0.358   | 0.936 |                       |    |                    |                            |
| <b>RHOQ</b> | MR Egger   | 4           | -0.27 (-1.68,1.14)  | 0.708   |       | 0.357                 | 0  | -0.0054            | 0.94                       |
| <b>RND1</b> | Wald ratio | 1           | 0.212 (-2.14,2.57)  | 0.86    | 0.952 |                       |    |                    |                            |

Genes highlighted with orange encode proteins involved in cholesterol biosynthesis, while genes highlighted with green encode members of the Rho family. Pleiotropy assessment cannot be conducted for instruments consisting of  $\leq 2$  independent SNPs as it requires  $> 2$  SNPs. The results reported as log ORs with the 95% CI per 1-SD higher expression of the target gene in blood. *For Abbreviations, see Table S2.*

## References

1. Roxburgh R, Seaman S, Masterman T, et al. Multiple Sclerosis Severity Score: using disability and disease duration to rate disease severity. *Neurology*. 2005;64(7):1144-51.
2. Sawcer S, Hellenthal G, Pirinen M, et al. Genetic risk and a primary role for cell-mediated immune mechanisms in multiple sclerosis. *Nature*. 2011;476(7359):214.
3. Azzarelli R, Kerloch T, Pacary E. Regulation of cerebral cortex development by Rho GTPases: insights from in vivo studies. *Frontiers in cellular neuroscience*. 2015;8:445.
